# Supplementary material for: Novel quinazolinone MJ-33 induces AKT/mTOR-mediated autophagy-associated apoptosis in 5FU-resistant colorectal cancer cells
Source: PubMed Central journal article supplement — Oncol Rep. 2020 Dec 3;45(2):680–92. doi: 10.3892/or.2020.7882 (PMC7757098; doi:10.3892/or.2020.7882), 2020-12-03
Supplement: Supplementary_Data1.pdf [file Supplementary_Data1.pdf]

Video S1. Effects of MJ-33 on fluorouracil-resistant HT-29 cell confluence and proliferation. Cells were incubated with or without 50  $\mu$ M MJ-33. Dynamic cell imaging was captured using the IncuCyte S3 ZOOM System at 2 h intervals for 48 h.
